# Supplementary material for: Synthesis and validation of click-modified NOD1/2 agonists
Source: PubMed Central journal article supplement — Innate Immun. 2023 Oct 13;29(8):186–200. doi: 10.1177/17534259231207198 (PMC10621468; doi:10.1177/17534259231207198), 2023-10-13
Supplement: sj-pdf-1-ini-10.1177_17534259231207198.pdf [file sj-pdf-1-ini-10.1177_17534259231207198.pdf]

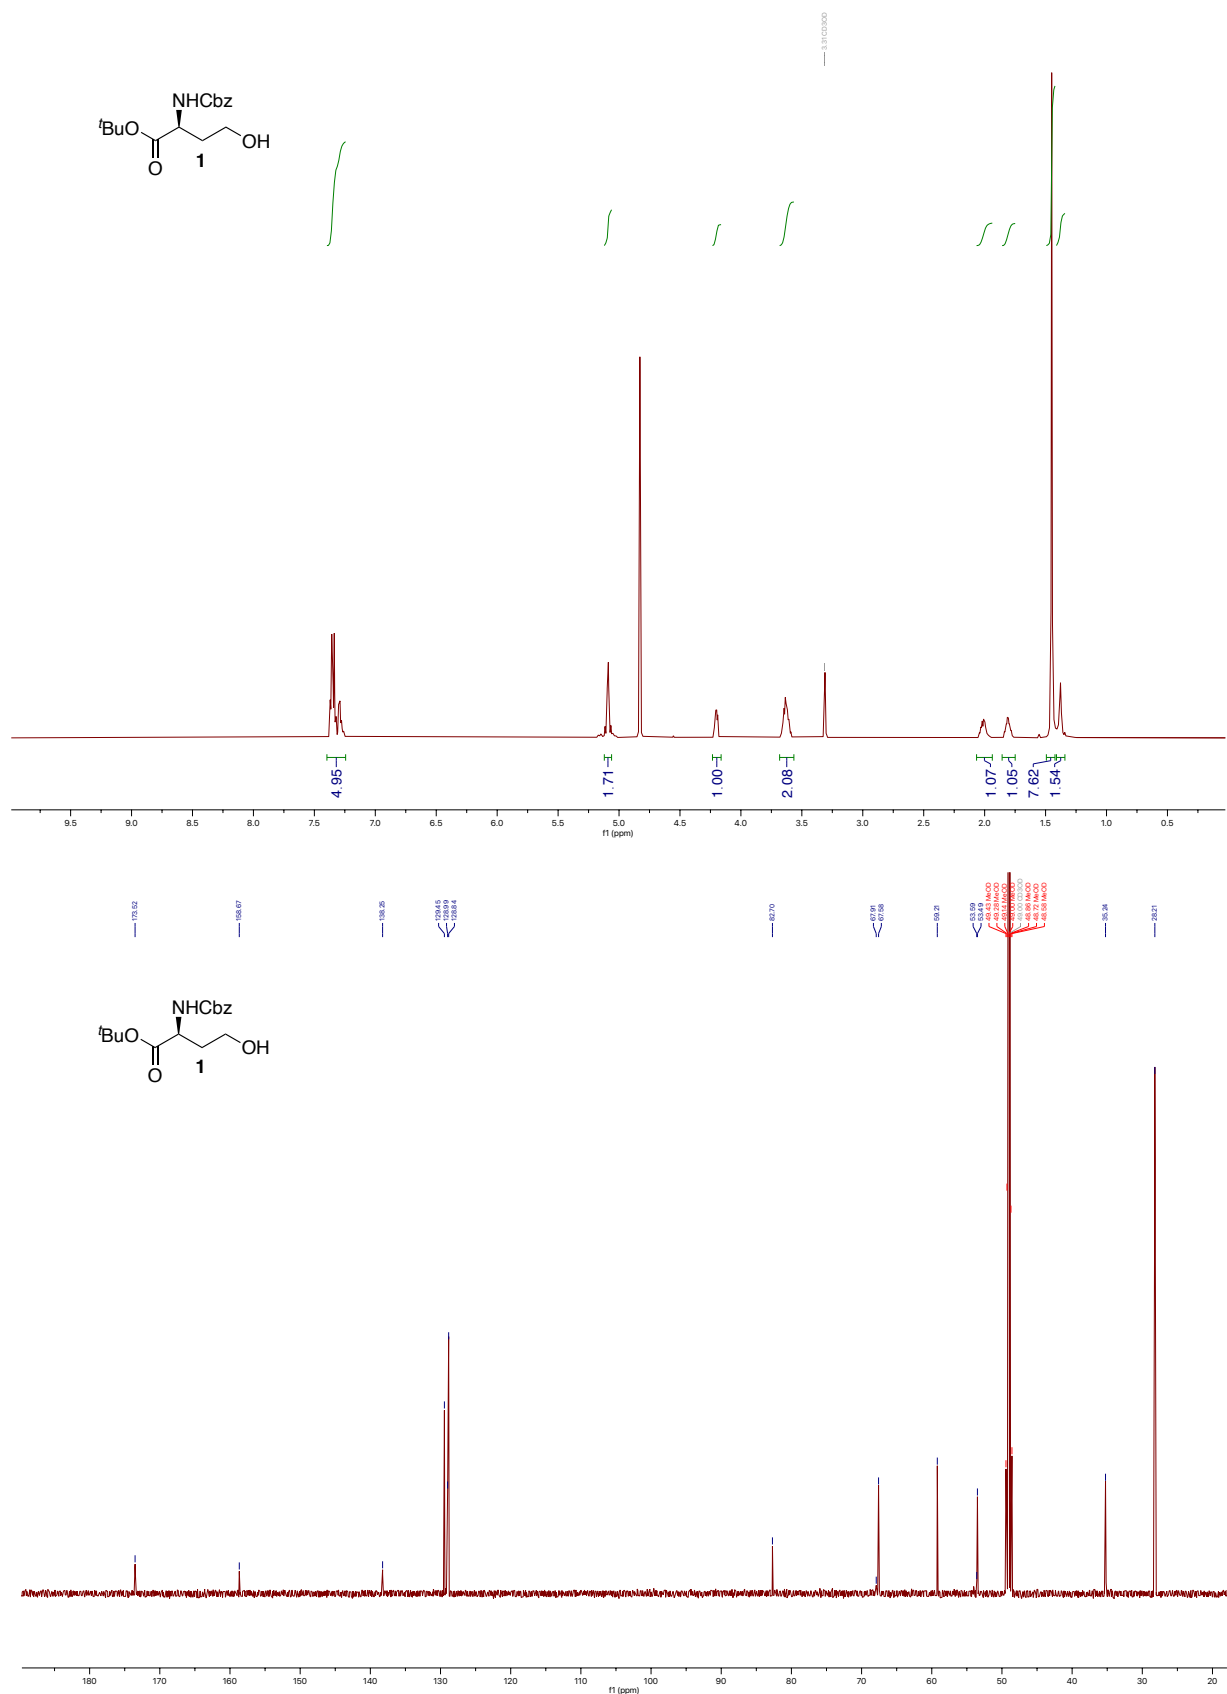

**Figure A.** Spectral data for *Tert*-butyl ((benzyloxy)carbonyl)-*L*-homoserinate (**1**)  
 Top:  $^1\text{H NMR}$  Bottom:  $^{13}\text{C NMR}$

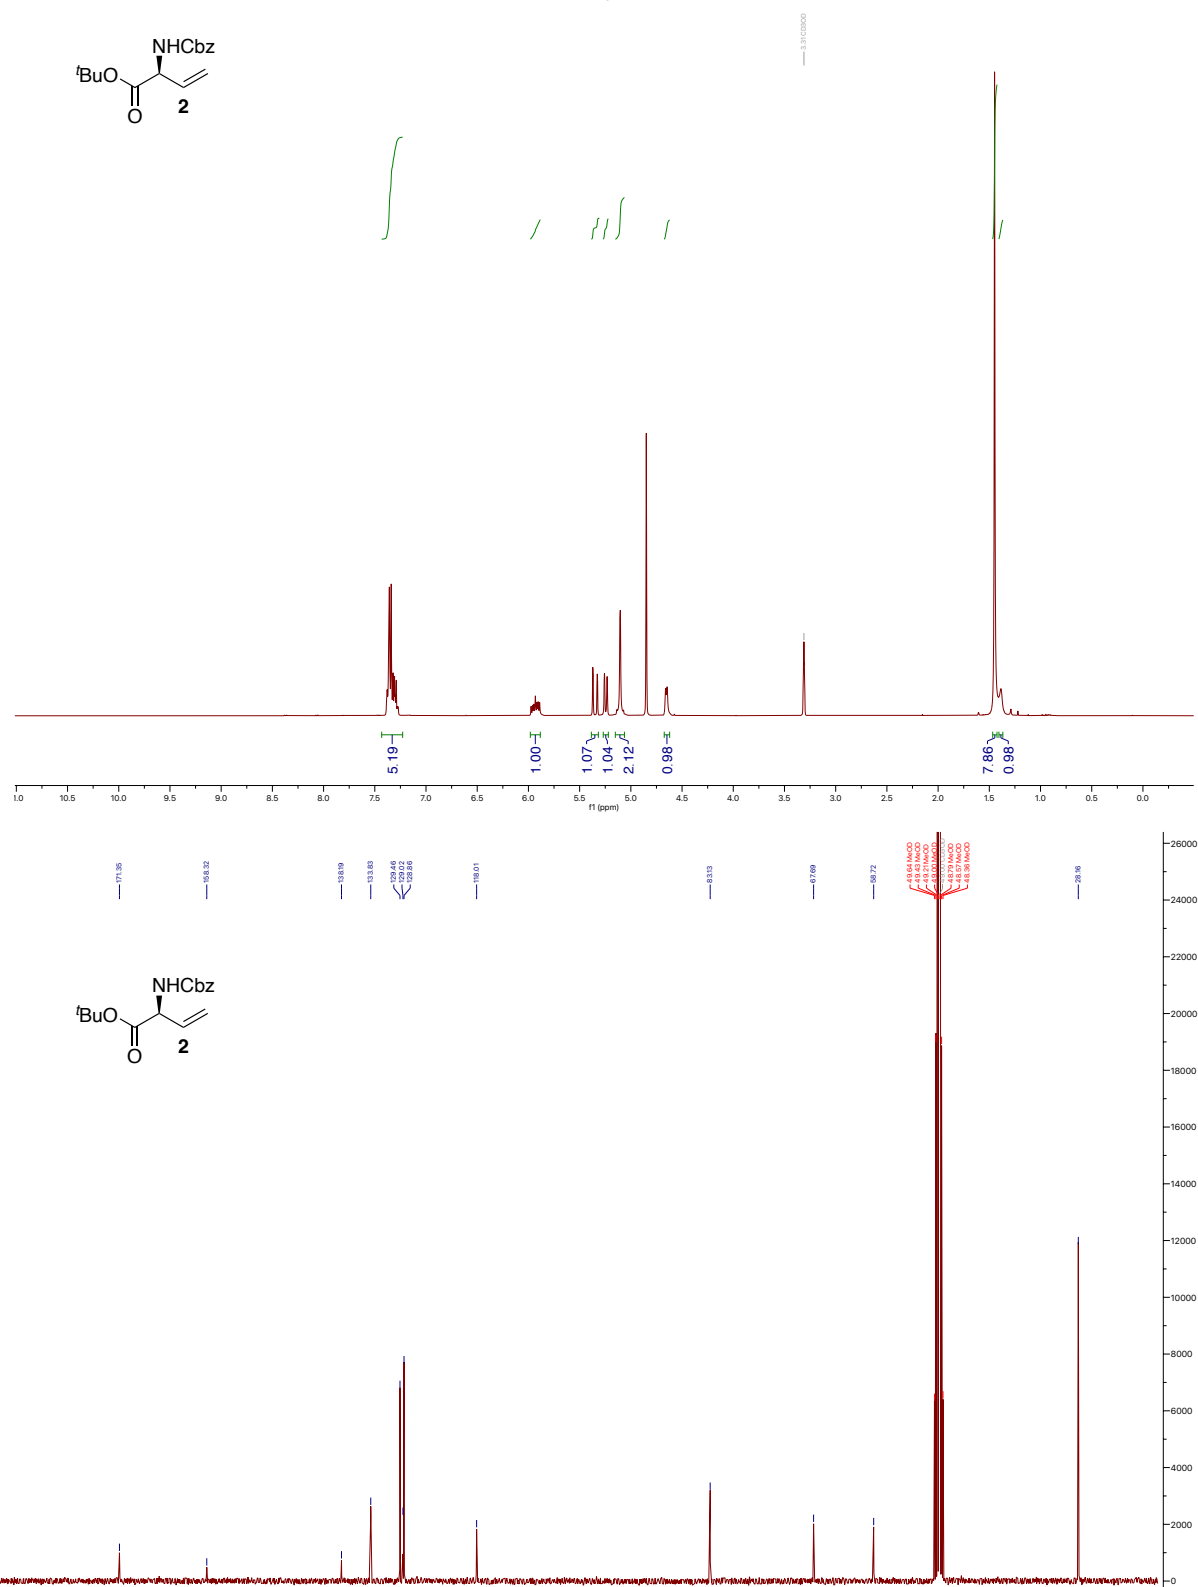

**Figure B.** Spectral data for *Tert*-butyl (*S*)-2-(((benzyloxy)carbonyl)amino)but-3-enoate (**2**) Top: <sup>1</sup>H NMR Bottom: <sup>13</sup>C NMR

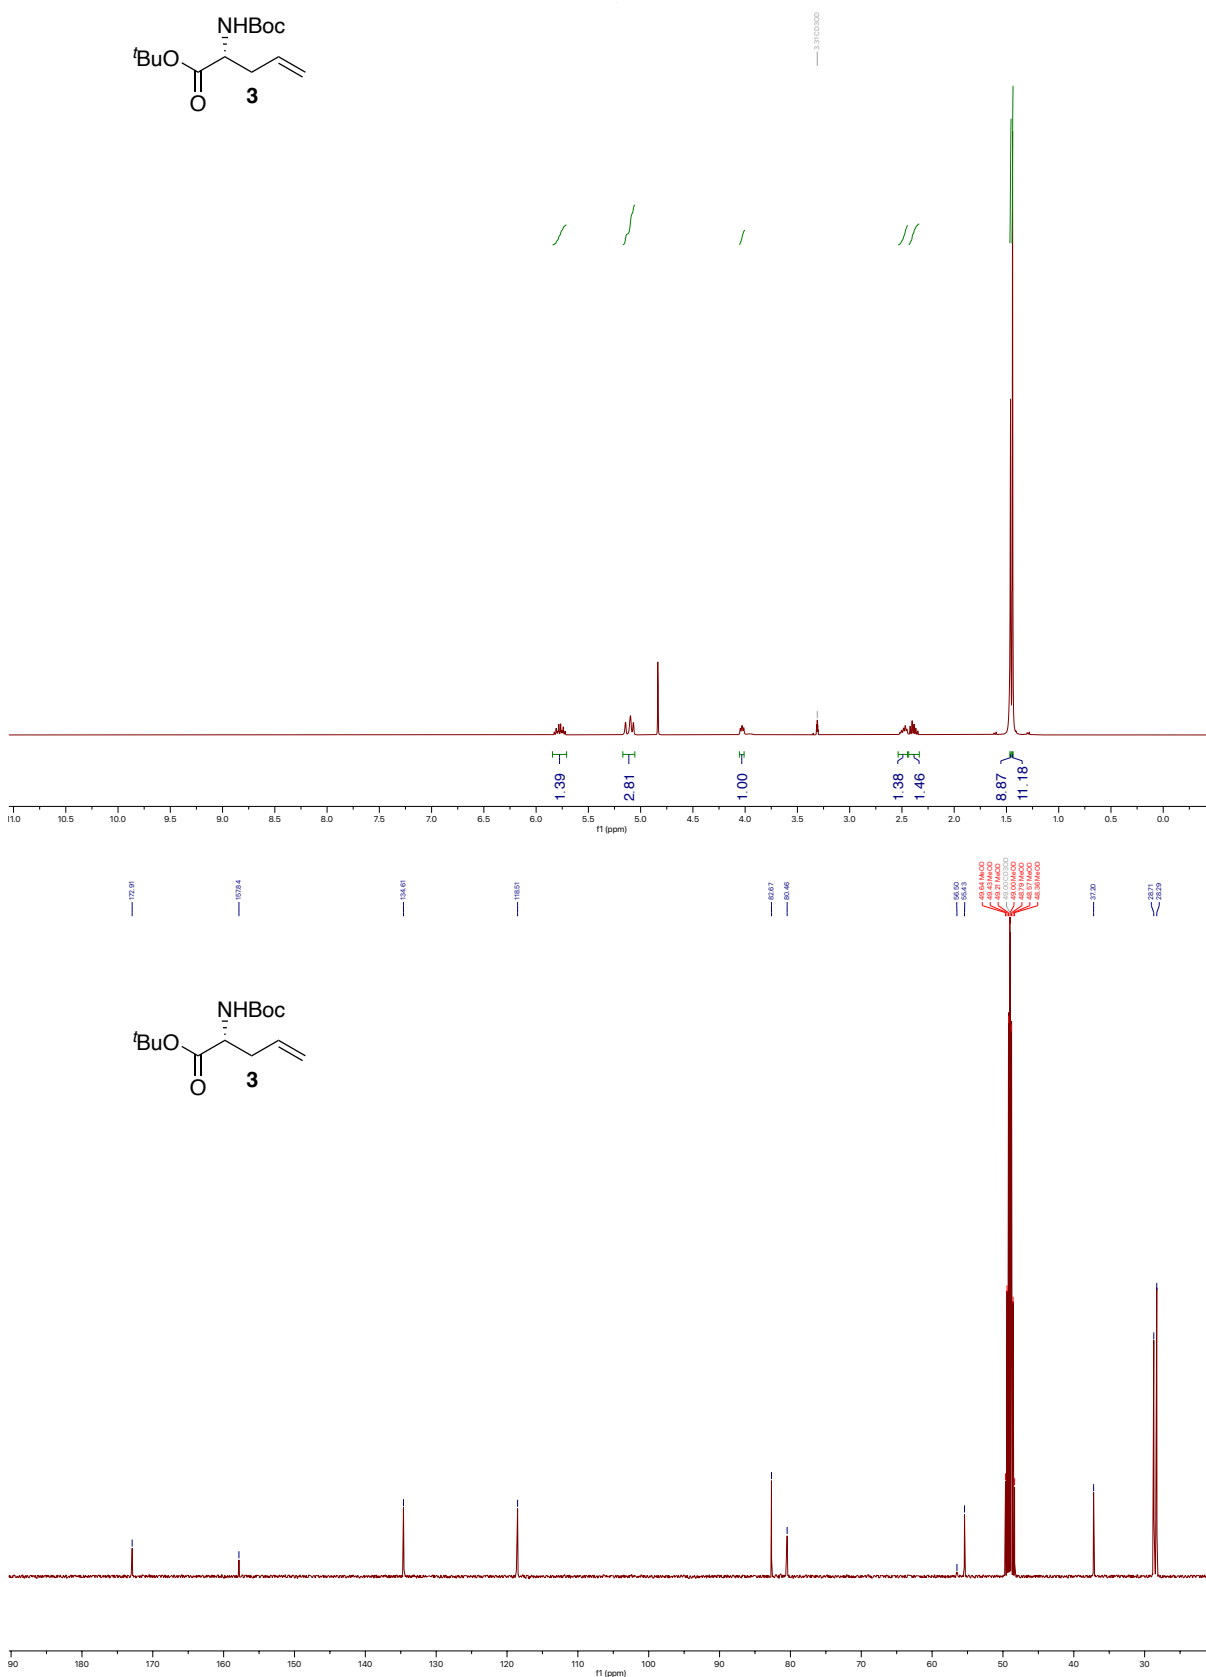

**Figure C.** Spectral data for *Tert*-butyl (*R*)-2-((*tert*-butoxycarbonyl)amino)pent-4-enoate (**3**) Top:  $^1\text{H}$  NMR Bottom:  $^{13}\text{C}$  NMR



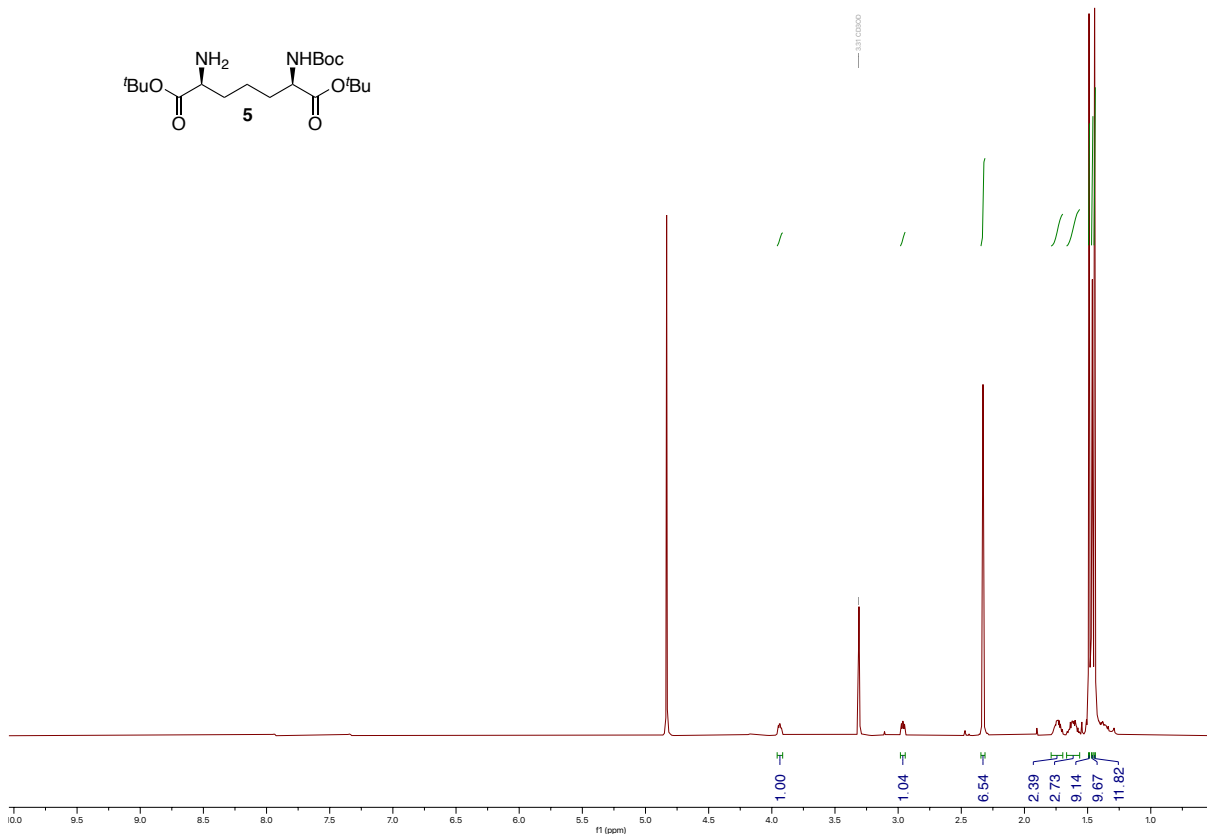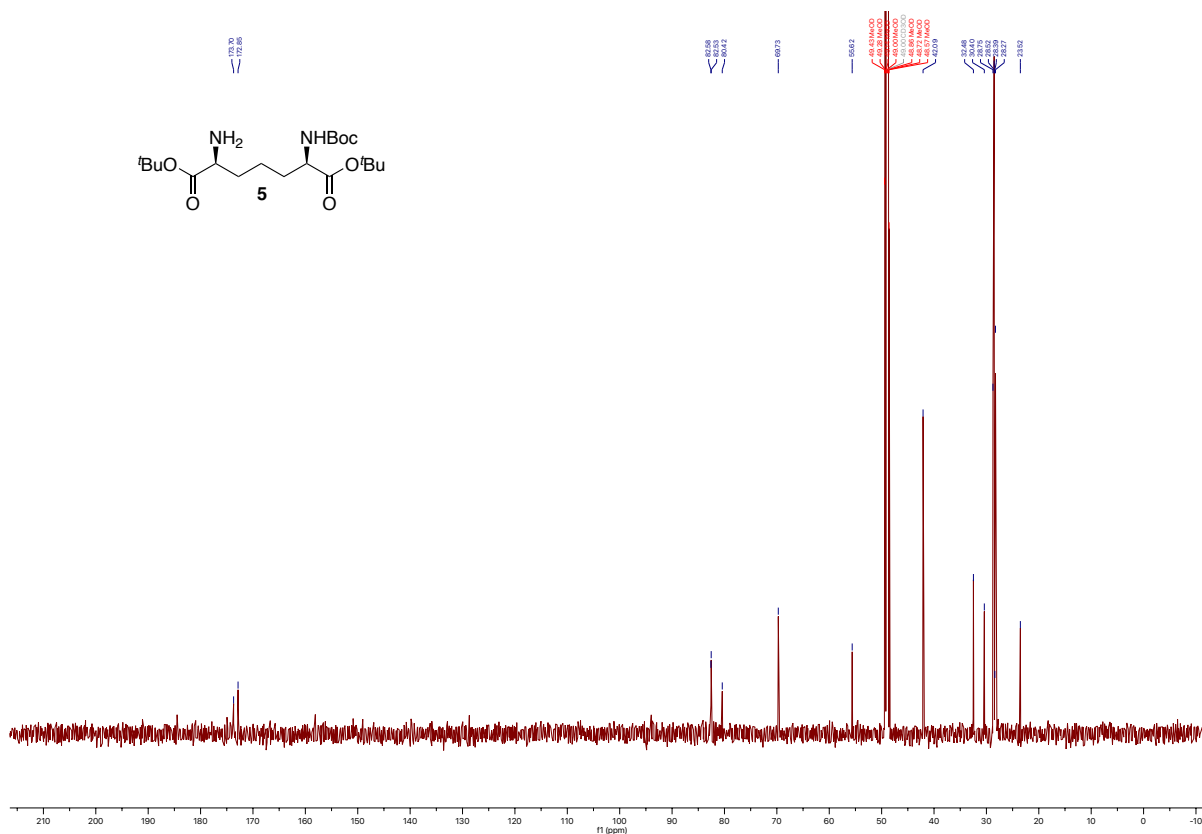

**Figure E.** Spectral data for Di-*tert*-butyl(2*S*,6*R*)-2-amino-6-((*tert*-butoxycarbonyl)amino)heptanedioate (5) Top: <sup>1</sup>H NMR Bottom: <sup>13</sup>C NMR

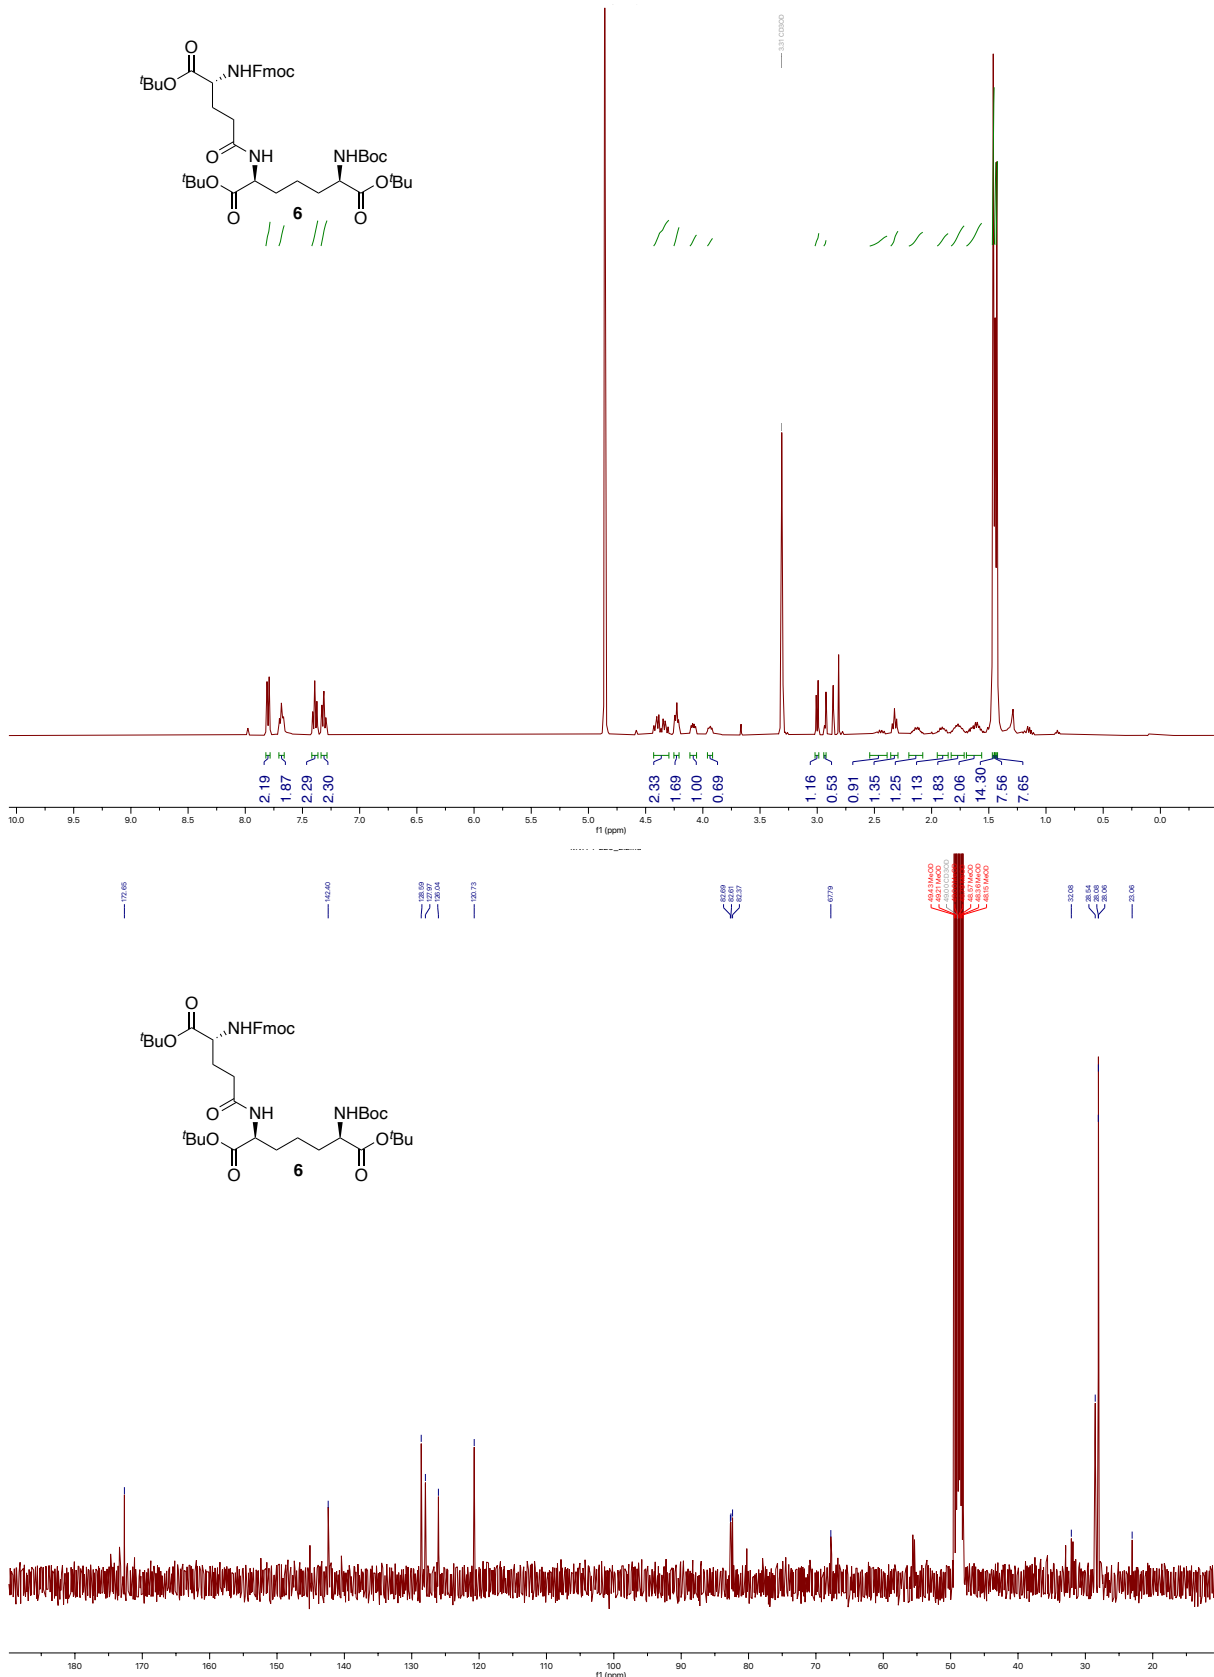

**Figure F.** Spectral data for Tri-*tert*-butyl (5*R*,10*S*,14*R*)-1-(9*H*-fluoren-9-ylmethoxy carbonyl)-18,18 dimethyl-3,8,16-trioxo-2,17-dioxa-4,9,15-triazanonadecane-5,10,14-tricarboxylate (6) Top: <sup>1</sup>H NMR Bottom: <sup>13</sup>C NMR
